# Supplementary material for: Safety and efficacy of CPX-351 in younger patients (&lt;60 years old) with secondary acute myeloid leukemia
Source: Oxford University Press journal article supplement (doi:10.1182/blood.2022016678), 2022-12-09
Supplement: blood_bld-2022-016678-mmc1.pdf [file blood_bld-2022-016678-mmc1.pdf]

**Supplementary Table 1.** Baseline Molecular Abnormalities in all patients (n=66)

| <b>Mutation</b> | <b>N/total pts tested (%)</b> | <b>Mutation</b> | <b>N/total pts tested (%)</b> | <b>Mutation</b> | <b>N/total pts tested (%)</b> |
|-----------------|-------------------------------|-----------------|-------------------------------|-----------------|-------------------------------|
| <i>TP53</i>     | 19/66 (29)                    | <i>KRAS</i>     | 5/66 (8)                      | <i>SETBP1</i>   | 3/66 (5)                      |
| <i>RUNX1</i>    | 14/66 (21)                    | <i>SF3B1</i>    | 5/66 (8)                      | <i>U2AF1</i>    | 3/66 (5)                      |
| <i>DNMT3A</i>   | 11/66 (17)                    | <i>SRSF2</i>    | 5/66 (8)                      | <i>ZRSR2</i>    | 3/66 (5)                      |
| <i>NRAS</i>     | 11/66 (17)                    | <i>TET2</i>     | 5/66 (8)                      | <i>CBL</i>      | 2/66 (3)                      |
| <i>ASXL1</i>    | 7/66 (11)                     | <i>ETV6</i>     | 4/66 (6)                      | <i>IRF1</i>     | 2/66 (3)                      |
| <i>NPM1</i>     | 7/66 (11)                     | <i>PTPN11</i>   | 4/66 (6)                      | <i>NF1</i>      | 2/66 (3)                      |
| <i>FLT3 ITD</i> | 5/66 (8)                      | <i>WT1</i>      | 4/66 (6)                      | <i>SDHD</i>     | 2/66 (3)                      |
| <i>GATA2</i>    | 5/66 (8)                      | <i>BCORL1</i>   | 3/66 (5)                      | <i>STAG2</i>    | 2/66 (3)                      |
| <i>IDH1</i>     | 5/66 (8)                      | <i>EZH2</i>     | 3/66 (5)                      | <i>UTAF1</i>    | 2/66 (3)                      |
| <i>JAK2</i>     | 5/66 (8)                      | <i>IDH2</i>     | 3/66 (5)                      |                 |                               |

**Supplementary Table 2.** Disposition of patients after completing 1 cycle of therapy with CPX-351

| <b>Outcome of C1</b> | <b>Consolidation with CPX-351<br/>N (%)</b> | <b>AlloHSCT Alone<br/>N (%)</b> | <b>Consolidation + AlloHSCT<br/>N (%)</b> |  |  |  |  |
|----------------------|---------------------------------------------|---------------------------------|-------------------------------------------|--|--|--|--|
| <b>CR/Cri/MLFS</b>   | 20 (30)                                     | 2 (3)                           | 22 (33)                                   |  |  |  |  |

  

| <b>Outcome of C1</b>      | <b>Second Induction with CPX-351<br/>N (%)</b> | <b>Allogeneic HSCT with CPX-351<br/>N (%)</b> | <b>Allogeneic HSCT<br/>N (%)</b> | <b>CLAG-M<br/>N (%)</b> | <b>HiDAC<br/>N (%)</b> | <b>FLAG<br/>N (%)</b> | <b>HMA/ven<br/>N (%)</b> |
|---------------------------|------------------------------------------------|-----------------------------------------------|----------------------------------|-------------------------|------------------------|-----------------------|--------------------------|
| <b>Refractory Disease</b> | 7 (32)                                         | 0 (0)                                         | 7 (32)                           | 7 (11)                  | 1 (2)                  | 3 (5)                 | 8 (12)                   |

Abbreviations: CR= complete remission; Cri= complete remission with incomplete count recovery. MLFS= morphologic leukemia free state; Allo= allogeneic; HSCT=hematopoietic stem cell transplant; HMA= hypomethylating agent; Ven= venetoclax; CLAG-M= cladribine, cytarabine, mitoxantrone, GCSF; HiDAC= high dose cytarabine; FLAG= fludarabine, cytarabine, GCSF; C1= cycle 1

**Supplementary Table 3.** Outcomes by Subgroup Analysis

| <b>Response to Therapy</b>                       | <b>Entire Cohort<br/>(N=62)</b> | <b>TP53 mut<br/>(N=19)</b> | <b>TP53 WT<br/>(N=41)</b> | <b>HMA Naïve<br/>(N=46)</b> | <b>Prior HMA<br/>(N=16)</b> |
|--------------------------------------------------|---------------------------------|----------------------------|---------------------------|-----------------------------|-----------------------------|
| <b>Pt Number (%)</b>                             | <b>N (%)</b>                    | <b>N (%)</b>               | <b>N (%)</b>              | <b>N (%)</b>                | <b>N (%)</b>                |
| CR/CRI                                           | 27 (43.5%)                      | 6 (31.5%)                  | 21 (48.8%)                | 23 (50%)                    | 4 (25%)                     |
| MLFS                                             | 2 (3.2%)                        | 1 (5.2%)                   | 1 (2.3%)                  | 1 (2%)                      | 1 (6.3%)                    |
| NR                                               | 33 (53%)                        | 12 (63.2%)                 | 19 (46.3%)                | 22 (47.8%)                  | 11 (68.6%)                  |
| Median OS<br>(Range in mos)                      | 12.2 mos<br>(0.2-36.2)          | 13.6 mos<br>(0.6-28.3)     | 8.6 mos<br>(0.2-36.2)     | 10.2 mos<br>(0.5-28.5)      | 12.2 mos<br>(1.3-36.2)      |
| Event-free survival<br>(Range in mos)            | Not Reached<br>(0.5-14.2)       | Not Reached<br>(0.5-13.7)  | Not Reached<br>(0.7-13)   | Not Reached<br>(0.5-13.7)   | Not Reached<br>(0.7-13.7)   |
|                                                  | <b>Entire Cohort<br/>(N=31)</b> | <b>TP53 mut<br/>(N=8)</b>  | <b>TP53WT<br/>(N=21)</b>  | <b>HMA Naïve<br/>(N=8)</b>  | <b>Prior HMA<br/>(N=8)</b>  |
| Median OS landmark<br>for HSCT<br>(Range in mos) | Not Reached<br>(0.5-14.2)       | Not Reached<br>(2.3-24.1)  | Not Reached<br>(0.1-34.1) | Not Reached<br>(2.7-34.1)   | 15.95<br>(2.1-33.6)         |

Abbreviations: CR= complete remission; CRI= complete remission with incomplete count recovery; MLFS= morphologic leukemia free state; NR = no response; OS= overall survival; HSCT= hematopoietic stem cell transplant; WT= wildtype; HMA= hypomethylating agent; mos= months; mut = mutant

**Supplementary Table 4.** Median time to count recovery

|                            | <b>ANC (&gt;500)</b> | <b>Platelet (&gt;50K)</b> |
|----------------------------|----------------------|---------------------------|
| <b>Median days (range)</b> | 37.2 (26 – 48)       | 39.8 (38 – 52)            |

**Supplementary Table 5.** Most commonly reported adverse events grade  $\geq 3$  in all patients (n=66)

|                                                       | <b>Neutropenic<br/>Fever</b> | <b>Sepsis</b> | <b>Pneumonia</b> | <b>Hemorrhage</b> | <b>Bacteremia</b> | <b>Progressive<br/>Disease</b> |
|-------------------------------------------------------|------------------------------|---------------|------------------|-------------------|-------------------|--------------------------------|
| <b>Grade <math>\geq 3</math><br/>Events<br/>N (%)</b> | 29 (67)                      | 14 (33)       | 11 (26)          | 4 (9)             | 8 (19)            | 0 (0)                          |
| <b>Grade 5<br/>Events<br/>N (%)</b>                   | 0 (0)                        | 2 (3)         | 2 (3)            | 0 (0)             | 0 (0)             | 7 (11)                         |
